# Supplementary material for: Understanding why primary care doctors leave direct patient care: a systematic review of qualitative research
Source: PubMed Central journal article supplement (PMC7228506; doi:10.1136/bmjopen-2019-029846), 2020-05-12
Supplement: bmjopen-2019-029846supp001.pdf [file bmjopen-2019-029846supp001.pdf]

**Appendix 1 - Literature search strategies****Database: MEDLINE**

Host: Ovid

Data Parameters: 1946 to January Week 3 2016

Date Searched: 29/01/2016

Searcher: SR

Hits: 3655

Strategy:

1. Family Practice/ or General Practice/
2. physicians, family/ or physicians, primary care/
3. General Practitioners/
4. Primary Health Care/
5. "primary care".tw.
6. "general practi\$".tw.
7. "family doctor\$".tw.
8. "family physician\$".tw.
9. "family medic\$".tw.
10. (GP or GPs).tw.
11. or/1-10
12. (career\$ adj3 (interrupt\$ or chang\$ or pattern\$ or decision\$ or leav\$ or break\$)).tw.
13. (retire\$ adj3 (decision\$ or medical\$ or option\$ or choice\$ or pattern\$ or determin\$)).tw.
14. (job\$ adj3 (chang\$ or leav\$)).tw.
15. (work\$ adj3 (retention or retain\$)).tw.
16. (long adj3 (sick\$ or absen\$ or ill\$)).tw.
17. (burnout or "burn out").tw.
18. Job Satisfaction/
19. Personnel Turnover/
20. Career Choice/
21. Retirement/
22. or/12-21
23. 11 and 22
24. limit 23 to yr="1990 -Current"

**Database: MEDLINE(R) In-Process & Other Non-Indexed Citations**

Host: Ovid

Data Parameters: 28 January 2016

Date Searched: 28/01/2016

Searcher: SR

Hits: 87

Strategy:

1. "primary care".tw.
2. "general practi\$".tw.
3. "family doctor\$".tw.
4. "family physician\$".tw.
5. "family medic\$".tw.
6. (GP or GPs).tw.
7. or/1-6
8. (career\$ adj3 (interrupt\$ or chang\$ or pattern\$ or decision\$ or leav\$ or break\$)).tw.
9. (retire\$ adj3 (decision\$ or medical\$ or option\$ or choice\$ or pattern\$ or determin\$)).tw.
10. (job\$ adj3 (chang\$ or leav\$)).tw.
11. (work\$ adj3 (retention or retain\$)).tw.
12. (long adj3 (sick\$ or absen\$ or ill\$)).tw.
13. (burnout or "burn out").tw.

14. or/8-13
15. 7 and 14

**Database: PsycINFO**

Host: Ovid

Data Parameters: 1806 to January Week 4 2016

Date Searched: 29/01/2016

Searcher: SR

Hits: 511

Strategy:

1. family medicine/
2. family physicians/
3. general practitioners/
4. primary health care/
5. "primary care".tw.
6. "general practi\$.tw.
7. "family doctor\$.tw.
8. "family physician\$.tw.
9. "family medic\$.tw.
10. (GP or GPs).tw.
11. or/1-10
12. (career\$ adj3 (interrupt\$ or chang\$ or pattern\$ or decision\$ or leav\$ or break\$)).tw.
13. (retire\$ adj3 (decision\$ or medical\$ or option\$ or choice\$ or pattern\$ or determin\$)).tw.
14. (job\$ adj3 (chang\$ or leav\$)).tw.
15. (work\$ adj3 (retention or retain\$)).tw.
16. (long adj3 (sick\$ or absen\$ or ill\$)).tw.
17. (burnout or "burn out").tw.
18. job satisfaction/
19. employee turnover/
20. occupational choice/
21. retirement/
22. or/12-21
23. 11 and 22
24. limit 23 to yr="1990 -Current"

**Database: HMIC (Health Management Information Consortium)**

Host: Ovid

Data Parameters: 1979 to November 2015

Date Searched:

Searcher: SR

Hits: 417

Strategy:

1. exp general practice/
2. exp general practitioners/
3. primary care/
4. "primary care".tw.
5. "general practi\$.tw.
6. "family doctor\$.tw.
7. "family physician\$.tw.
8. "family medic\$.tw.
9. (GP or GPs).tw.
10. or/1-9

11. (career\$ adj3 (interrupt\$ or chang\$ or pattern\$ or decision\$ or leav\$ or break\$)).tw.
12. (retire\$ adj3 (decision\$ or medical\$ or option\$ or choice\$ or pattern\$ or determin\$)).tw.
13. (job\$ adj3 (chang\$ or leav\$)).tw.
14. (work\$ adj3 (retention or retain\$)).tw.
15. (long adj3 (sick\$ or absen\$ or ill\$)).tw.
16. (burnout or "burn out").tw.
17. job satisfaction/
18. occupational choice/
19. exp retirement/
20. or/11-19
21. 10 and 20
22. limit 21 to yr="1990 -Current"

**Database: ASSIA**

Host: ProQuest

Data Parameters: n/a

Date Searched: 29/01/2016

Searcher: SR

Hits: 214

Strategy:

1. TI,AB("primary care" OR "general practi\*" OR "family doctor\*" OR "family physician\*" OR "family medic\*" OR GP OR GPs) OR SU.EXACT("General practice" OR "General practitioners" OR "Primary health care")
2. TI,AB((career\* NEAR/2 (interrupt\* OR chang\* OR pattern\* OR decision\* OR leav\* OR break\*)) OR (retire\* NEAR/2 (decision\* OR medical\* OR option\* OR choice\* OR pattern\* OR determin\*)) OR (job\* NEAR/2 (chang\* OR leav\*)) OR (work\* NEAR/2 (retention OR retain\*)) OR (long NEAR/2 (sick\* OR absen\* OR ill\*)) OR (burnout OR "burn out")) OR SU.EXACT(("Job satisfaction") OR ("Career choice")) OR SU.EXACT.EXPLODE("Early retirement" OR "Mandatory retirement" OR "Retirement")
3. 1 AND 2

**Database: Cochrane**

Host: Cochrane Collaboration

Data Parameters: CENTRAL: Issue 12 of 12, December 2015; CDSR: Issue 1 of 12, January 2016

Date Searched: 29/01/2016

Searcher: SR

Hits: 75

Strategy:

- 1 MeSH descriptor: [General Practice] this term only
- 2 MeSH descriptor: [Family Practice] this term only
- 3 MeSH descriptor: [Physicians, Family] this term only
- 4 MeSH descriptor: [Physicians, Primary Care] this term only
- 5 MeSH descriptor: [General Practitioners] this term only
- 6 MeSH descriptor: [Primary Health Care] this term only
- 7 "primary care":ti or "primary care":ab
- 8 "general practi\*":ti or "general practi\*":ab
- 9 "family doctor\*":ti or "family doctor\*":ab
- 10 "family physician\*":ti or "family physician\*":ab

3

11 "family medic\*":ti or "family medic\*":ab  
 12 (GP or GPs):ti or (GP or GPs):ab  
 13 (13-#12)  
 14 (career\* near/3 (interrupt\* or chang\* or pattern\* or decision\* or leav\* or break\*)):ti  
 15 (career\* near/3 (interrupt\* or chang\* or pattern\* or decision\* or leav\* or break\*)):ab  
 16 (retire\* near/3 (decision\* or medical\* or option\* or choice\* or pattern\* or determin\*)):ti  
 17 (retire\* near/3 (decision\* or medical\* or option\* or choice\* or pattern\* or  
 determin\*)):ab  
 18 (job\* near/3 (chang\* or leav\*)):ti  
 19 (job\* near/3 (chang\* or leav\*)):ab  
 20 work\* near/3 (retention or retain\*):ti  
 21 work\* near/3 (retention or retain\*):ab  
 22 long near/3 (sick\* or absen\* or ill\*):ti  
 23 long near/3 (sick\* or absen\* or ill\*):ab  
 24 (burnout or "burn out"):ti  
 25 (burnout or "burn out"):ab  
 26 MeSH descriptor: [Job Satisfaction] this term only  
 27 MeSH descriptor: [Personnel Turnover] this term only  
 28 MeSH descriptor: [Career Choice] this term only  
 29 MeSH descriptor: [Retirement] this term only  
 30 (9-#29)  
 31 #13 and #30

#### Database: Web of Science

Host: Thomson Reuters

Data Parameters: SCI-EXPANDED and SSCI

Date Searched: 29/01/2016

Searcher: SR

Hits: 1702

Strategy:

1. **TOPIC:** (family (practic\* or doctor\* or physician\* or medic\*))
2. **TOPIC:** ("general practi\*")
3. **TOPIC:** ("primary care")
4. **TOPIC:** (GP or GPs)
5. 1 OR 2 OR 3 OR 4
6. **TOPIC:** (career near/2 (interrupt\* or chang\* or pattern\* or decision\* or leav\* or break\*))
7. **TOPIC:** (retire\* near/2 (decision\* or medical\* or option\* or choice\* or pattern\* or determin\*))
8. **TOPIC:** (job\* near/2 (chang\* or leav\*))
9. **TOPIC:** (work\* near/2 (retention or retain\*))
10. **TOPIC:** (long near/2 (sick\* or absen\* or ill\*))
11. **TOPIC:** ((burnout or "burn out"))
12. **6 OR 7 OR 8 OR 9 OR 10 OR 11**
- 13.5 AND 12
14. Limit to 1990-

**Appendix 2 - List of high-income OECD countries, defined by the World Bank as a country with a gross national income per capita US\$12,236 or more in 2016**

Australia  
Austria  
Belgium  
Canada  
Chile  
Czech Republic  
Denmark  
Estonia  
Finland  
France  
Germany  
Greece  
Hungary  
Iceland  
Ireland  
Israel  
Italy  
Japan  
Korea, Rep.  
Luxembourg  
Netherlands  
New Zealand  
Norway  
Poland  
Portugal  
Slovak Republic  
Slovenia  
Spain  
Sweden  
Switzerland  
United Kingdom  
United States

**Appendix 3 - Excluded studies with reasons**

|   | <b>Paper</b>                                                                                                                                                                                          | <b>Reason for exclusion</b>                                                                                                                     |
|---|-------------------------------------------------------------------------------------------------------------------------------------------------------------------------------------------------------|-------------------------------------------------------------------------------------------------------------------------------------------------|
| 1 | Aseltine RH, Jr., Katz MC. Connecticut physician workforce survey 2008: initial findings on physician perceptions and potential impact on access to medical care. <i>Conn Med.</i> 2008;72(9):539-46. | Not clear whether participants are GPs/PCPs. No examination of factors/associations with/determinants of quitting/intention to quit profession. |
| 2 | Aseltine RH, Jr., Katz MC, Geragosian AH. Connecticut physician workforce survey 2009: physician satisfaction, physician supply and                                                                   | No examination of factors/associations with/determinants of quitting/intention to quit profession.                                              |

|    |                                                                                                                                                                                                                                                              |                                                                                                                                                                                                               |
|----|--------------------------------------------------------------------------------------------------------------------------------------------------------------------------------------------------------------------------------------------------------------|---------------------------------------------------------------------------------------------------------------------------------------------------------------------------------------------------------------|
|    | patient access to medical care. <i>Conn Med.</i> 2010;74(5):281-91.                                                                                                                                                                                          |                                                                                                                                                                                                               |
| 3  | Ashworth M., Armstrong D. Sources and implications of dissatisfaction among new GPs in the inner city. <i>Family Practice</i> 1999;16(1):18-22.                                                                                                              | No examination of factors/associations with/determinants of quitting/intention to quit profession.<br>Career decisions and progression.                                                                       |
| 4  | Baker, M., J. Williams, and R. Petchey, GPs in principle but not in practice: a study of vocationally trained doctors not currently working as principals. <i>BMJ</i> , 1995. 310(6990): p. 1301-4.                                                          | No qualitative data                                                                                                                                                                                           |
| 5  | Baker, M., The work commitments of general practitioners: a study of 1986, 1991 and 1996 cohort JCPTGP qualifiers. Monograph series, Nottingham Primary Care Research Unit. 2000, Nottingham: University of Nottingham Division of General Practice. iii,45. | No qualitative data                                                                                                                                                                                           |
| 6  | Barnett RC, Gareis KC, Carr PL. Career satisfaction and retention of a sample of women physicians who work reduced hours. <i>Journal of Womens Health.</i> 2005;14(2):146-53.                                                                                | Not clear whether are GPs/PCPs.                                                                                                                                                                               |
| 7  | Beasley JW, Karsh BT, Sainfort F, Hagenauer ME, Marchand L. Quality of work life of family physicians in Wisconsin's health care organizations: a WReN study. <i>Wisconsin Med Jnl.</i> 2004;103(7):51-5.                                                    | No examination of factors/associations with/determinants of quitting/intention to quit profession.<br>Turnover between different employers.                                                                   |
| 8  | Beasley JW, Karsh BT, Hagenauer ME, Marchand L, Sainfort F. Quality of work life of independent vs employed family physicians in Wisconsin: a WreN study. <i>Ann Fam Med.</i> 2005;3(6):500-6.                                                               | No examination of factors/associations with/determinants of quitting/intention to quit profession.<br>Turnover between different employers.                                                                   |
| 9  | Brett TD, Arnold-Reed DE, Phan CT, Moorhead RG, Hince DA. Work intentions and opinions of general practice registrars. <i>Medical Journal of Australia,</i> 2009; 191 (2):73-4.                                                                              | No qualitative data                                                                                                                                                                                           |
| 10 | British Medical Association. National survey of GPs: the future of General Practice 2015. BMA. 2015.                                                                                                                                                         | No examination of factors/associations with/determinants of quitting/intention to quit profession.                                                                                                            |
| 11 | Buchbinder SB, Wilson M, Melick CF, Powe NR. Primary care physician job satisfaction and turnover. <i>Am J Manag Care.</i> 2001;7(7):701-13.                                                                                                                 | <90% are GPs/PCPs and results for GPs not reported separately.<br>No examination of factors/associations with/determinants of quitting/intention to quit profession.<br>Turnover between different employers. |
| 12 | Buddeberg-Fischer B, Stamm M, Buddeberg C, Bauer G, Haemmig O, Knecht M, et al. The impact of gender and parenthood on physicians' careers - professional and personal situation seven years after graduation. <i>BMC Health Serv Res.</i> 2010;10:10.       | <90% are GPs/PCPs and results for GPs not reported separately.<br>No examination of factors/associations with/determinants of quitting/intention to quit profession.                                          |
| 13 | Calitri R, Adams A, Atherton H, Reeve J, Hill NR. Investigating the sustainability of careers in                                                                                                                                                             | Not clear whether are GPs/PCPs.                                                                                                                                                                               |

|    |                                                                                                                                                                                                                                                  |                                                                                                                                                                                                           |
|----|--------------------------------------------------------------------------------------------------------------------------------------------------------------------------------------------------------------------------------------------------|-----------------------------------------------------------------------------------------------------------------------------------------------------------------------------------------------------------|
|    | academic primary care: a UK survey. <i>BMC Fam Pract.</i> 2014;15:205.                                                                                                                                                                           | No examination of factors/associations with/determinants of quitting/intention to quit profession.                                                                                                        |
| 14 | Cameron R, Redman S, Burrow S, Young B. Comparison of career patterns of male and female graduates of one Australian medical school. <i>Teaching and Learning in Medicine.</i> 1995;7(4):218-24.                                                 | <90% are GPs/PCPs and results for GPs not reported separately.<br>No examination of factors/associations with/determinants of quitting/intention to quit profession.<br>Career decisions and progression. |
| 15 | Carr PL, Gareis KC, Barnett RC. Characteristics and outcomes for women physicians who work reduced hours. <i>Journal of Womens Health &amp; Gender-Based Medicine.</i> 2003;12(4):399-405.                                                       | Not clear whether are GPs/PCPs.<br>No examination of factors/associations with/determinants of quitting/intention to quit profession.                                                                     |
| 16 | Chambers M, Colthart I and McKinstry B. Scottish general practitioners' willingness to take part in a post-retirement retention scheme: questionnaire survey. <i>British Medical Journal.</i> 2004. 328(7435): p. 329.                           | No qualitative data                                                                                                                                                                                       |
| 17 | Cheraghi-Sohi S, McDonald R, Harrison S, Sanders C. Experience of contractual change in UK general practice: a qualitative study of salaried GPs. <i>British Journal of General Practice.</i> 2012;62(597):e282-7.                               | No examination of factors/associations with/determinants of quitting/intention to quit profession.                                                                                                        |
| 18 | Commonwealth Fund. Primary care providers' views of recent trends in health care delivery and payment: findings from the Commonwealth Fund/Kaiser Family Foundation 2015 national survey of primary care providers. <i>Issue Brief.</i> 2015;24. | <90% are GPs/PCPs and results for GPs not reported separately.                                                                                                                                            |
| 19 | Cossmann JS. Mississippi's physician labor force: current status and future challenges. <i>J Miss State Med Assoc.</i> 2004;45(1):8-31.                                                                                                          | Not clear whether are GPs/PCPs.<br>No examination of factors/associations with/determinants of quitting/intention to quit profession.                                                                     |
| 20 | Crouse BJ. Recruitment and retention of family physicians. <i>Minn Med.</i> 1995;78(10):29-32.                                                                                                                                                   | Uses pre-1990 data (from 1982 and 1984).                                                                                                                                                                  |
| 21 | Dale J et al. Retaining the general practitioner workforce in England: what matters to GPs? A cross-sectional study. <i>BMC Family Practice.</i> 2015. 16(1): p. 140.                                                                            | No qualitative data                                                                                                                                                                                       |
| 22 | Davidson JM, Lambert TW, Parkhouse J, Evans J, Goldacre MJ. Retirement intentions of doctors who qualified in the United Kingdom in 1974: Postal questionnaire survey. <i>Journal of Public Health Medicine.</i> 2001;23(4):323-8.               | Not clear whether are GPs/PCPs.                                                                                                                                                                           |
| 23 | Degen C, Li J, Angerer P. Physicians' intention to leave direct patient care: An integrative review. <i>Human Resources for Health.</i> 2015;13(1).                                                                                              | Not clear whether are GPs/PCPs.                                                                                                                                                                           |
| 24 | DesRoches CM, Buerhaus P, Dittus RS, Donelan K. Primary care workforce shortages and career recommendations from practicing clinicians. <i>Acad Med.</i> 2015;90(5):671-7.                                                                       | No examination of factors/associations with/determinants of quitting/intention to quit profession.<br>Career decisions.                                                                                   |

|    |                                                                                                                                                                                                                                                                 |                                                                                                                                                          |
|----|-----------------------------------------------------------------------------------------------------------------------------------------------------------------------------------------------------------------------------------------------------------------|----------------------------------------------------------------------------------------------------------------------------------------------------------|
| 25 | Dewa CS, Loong D, Bonato S, Thanh NX, Jacobs P. How does burnout affect physician productivity? A systematic literature review. <i>BMC Health Services Research</i> . 2014;14(1).                                                                               | Not clear whether are GPs/PCPs.<br>Burnout but not associated with absence from work.                                                                    |
| 26 | Dewa CS, Jacobs P, Xuan Thanh N, Loong D. An estimate of the cost of burnout on early retirement and reduction in clinical hours of practicing physicians in Canada <i>BMC Health Services Research</i> . 2014; 14: 254                                         | No qualitative data                                                                                                                                      |
| 27 | Dowell AC, Hamilton S, McLeod DK. Job satisfaction, psychological morbidity and job stress among New Zealand general practitioners. <i>N Z Med J</i> . 2000;113(1113):269-72.                                                                                   | No examination of factors/associations with/determinants of quitting/intention to quit profession.                                                       |
| 28 | Evans J, Lambert T, and Goldacre M, GP recruitment and retention: a qualitative analysis of doctors' comments about training for and working in general practice. <i>Occasional Paper - Royal College of General Practitioners</i> , 2002(83): p. iii-vi, 1-33. | No qualitative data                                                                                                                                      |
| 29 | Farber NJ, Bryson C, Collier VU, Weiner JL, Boyer EG. Work enjoyment, intention to discontinue practice, and burnout in primary care physicians. <i>J Gen Intern Med</i> . 2003;18(Supplement 1):240.                                                           | Conference abstract only.                                                                                                                                |
| 30 | French F. General practitioner non-principals benefit from flexible working. 2005.                                                                                                                                                                              | No qualitative data                                                                                                                                      |
| 31 | French F. Why do work patterns differ between men and women GPs? 2006.                                                                                                                                                                                          | No qualitative data                                                                                                                                      |
| 32 | Gibson J et al. Eighth National GP Worklife Survey UK. 2015.                                                                                                                                                                                                    | No qualitative data                                                                                                                                      |
| 33 | Gregory ST, Menser T. Burnout Among Primary Care Physicians: A Test of the Areas of Worklife Model. <i>J Healthc Manag</i> . 2015;60(2):133-48.                                                                                                                 | No examination of factors/associations with/determinants of quitting/intention to quit profession.<br>Burnout but not associated with absence from work. |
| 34 | Hall CB, Brazil K, Wakefield D, Lerer T, Tennen H. Organizational culture, job satisfaction, and clinician turnover in primary care. <i>J</i> . 2010;1(1):29-36.                                                                                                | No examination of factors/associations with/determinants of quitting/intention to quit profession.<br>Turnover between different employers.              |
| 35 | Hann M, Reeves D, and Sibbald B. Relationships between job satisfaction, intentions to leave family practice and actually leaving among family physicians in England. <i>European Journal of Public Health</i> , 2011. 21(4): p. 499-503.                       | No qualitative data                                                                                                                                      |
| 36 | Heponiemi T, Kouvonon A, Vänskä J, Halila H, Sinervo T, Kivimäki M, et al. Health, psychosocial factors and retirement intentions among Finnish physicians. <i>Occupational Medicine</i> . 2008;58(6):406-12.                                                   | Not clear whether are GPs/PCPs.                                                                                                                          |



|    |                                                                                                                                                                                                                                                                                            |                                                                                                                                                                                                               |
|----|--------------------------------------------------------------------------------------------------------------------------------------------------------------------------------------------------------------------------------------------------------------------------------------------|---------------------------------------------------------------------------------------------------------------------------------------------------------------------------------------------------------------|
| 37 | Heponiemi T, Kouvonon A, Vanska J, Halila H, Sinervo T, Kivimäki M, et al. Effects of active on-call hours on physicians' turnover intentions and well-being. <i>Scandinavian Journal of Work Environment &amp; Health</i> . 2008;34(5):356-63.                                            | <90% are GPs/PCPs and results for GPs not reported separately.<br>No examination of factors/associations with/determinants of quitting/intention to quit profession.<br>Turnover between different employers. |
| 38 | Heponiemi T, Kouvonon A, Vänskä J, Halila H, Sinervo T, Kivimäki M, et al. The Association of Distress and Sleeping Problems With Physicians' Intentions To Change Profession: The Moderating Effect of Job Control. <i>Journal of Occupational Health Psychology</i> . 2009;14(4):365-73. | Not clear whether are GPs/PCPs.                                                                                                                                                                               |
| 39 | Heponiemi T, Kouvonon A, Aalto AM, Elovainio M. Psychosocial factors in GP work: the effects of taking a GP position or leaving GP work. <i>Eur J Public Health</i> . 2013;23(3):361-6.                                                                                                    | Employment change either <i>from</i> or <i>to</i> general practice.<br>Turnover between different employers.                                                                                                  |
| 40 | Heponiemi T, Manderbacka K, Vanska J, Elovainio M. Can organizational justice help the retention of general practitioners? <i>Health Policy</i> . 2013;110(1):22-8.                                                                                                                        | No examination of factors/associations with/determinants of quitting/intention to quit profession.<br>Turnover between different employers.                                                                   |
| 41 | Heponiemi T, Elovainio M, Premeau J, Eccles MP. General practitioners' psychosocial resources, distress, and sickness absence: a study comparing the UK and Finland. <i>Family Practice</i> . 2014;31(3):319-24.                                                                           | No examination of factors/associations with/determinants of quitting/intention to quit profession.<br><i>All</i> sickness absence included, not necessarily long-term sickness absence.                       |
| 42 | Hockly A. Could health service reforms make general practitioners ill? <i>Journal of Public Mental Health</i> . 2012;11(2):50-3.                                                                                                                                                           | <90% are GPs/PCPs and results for GPs not reported separately.<br>No examination of factors/associations with/determinants of quitting/intention to quit profession.                                          |
| 43 | Hojat M, Gonnella JS, Erdmann JB, Veloski JJ, Xu G. Primary care and non-primary care physicians: a longitudinal study of their similarities, differences, and correlates before, during, and after medical school. <i>Acad Med</i> . 1995;70(1 Suppl):S17-28.                             | No examination of factors/associations with/determinants of quitting/intention to quit profession.<br>Career decisions.                                                                                       |
| 44 | Hung DY, Rundall TG, Cohen DJ, Tallia AF, Crabtree BF. Productivity and turnover in PCPs: the role of staff participation in decision-making. <i>Med Care</i> . 2006;44(10):946-51.                                                                                                        | <90% are GPs/PCPs and results for GPs not reported separately.<br>No examination of factors/associations with/determinants of quitting/intention to quit profession.<br>Turnover between different employers. |
| 45 | Hutchins A. An investigation into the benefits of prolonged study leave undertaken by general practitioners. 2005<br>Hutchins, A., An investigation into the benefits of prolonged study leave undertaken by general practitioners. 2005.                                                  | No qualitative data                                                                                                                                                                                           |

|    |                                                                                                                                                                                                                                                                                                            |                                                                                                                                                          |
|----|------------------------------------------------------------------------------------------------------------------------------------------------------------------------------------------------------------------------------------------------------------------------------------------------------------|----------------------------------------------------------------------------------------------------------------------------------------------------------|
| 46 | Jamieson JL, Webber EM, Sivertz KS. Re-entry residency training: opportunities and obstacles. <i>Can Fam Physician</i> . 2010;56(6):e226-32.                                                                                                                                                               | Career decisions and progression. Retraining programmes to change speciality and/or retraining as a GP. Balance of focus unclear.                        |
| 47 | Jewett EA, Brotherton SE, Ruch-Ross H. A national survey of 'inactive' physicians in the United States of America: enticements to reentry. <i>Hum Resour Health</i> . 2011;9:7.                                                                                                                            | <90% are GPs/PCPs and results for GPs not reported separately.                                                                                           |
| 48 | Johnson N. General practice careers: changing experience of men and women vocational trainees between 1974 and 1989. <i>British Journal of General Practice</i> . 1993;43(369):141-5.                                                                                                                      | No examination of factors/associations with/determinants of quitting/intention to quit profession.                                                       |
| 49 | Jones L, Fisher T. Workforce trends in general practice in the UK: results from a longitudinal study of doctors' careers. <i>British Journal of General Practice</i> . 2006;56(523):134-6.                                                                                                                 | No examination of factors/associations with/determinants of quitting/intention to quit profession.<br>Career decisions and progression.                  |
| 50 | Joyce CM, Scott A, Jeon SH, Humphreys J, Kalb G, Witt J, et al. The "medicine in Australia: balancing employment and life (MABEL)" longitudinal survey--protocol and baseline data for a prospective cohort study of Australian doctors' workforce participation. <i>BMC Health Serv Res</i> . 2010;10:50. | No examination of factors/associations with/determinants of quitting/intention to quit profession.                                                       |
| 51 | Joyce CM, Wang WC, McDonald HM. Retirement patterns of Australian doctors aged 65 years and older. <i>Australian Health Review</i> . 2015;39(5):582-7.                                                                                                                                                     | <90% are GPs/PCPs and results for GPs not reported separately.                                                                                           |
| 52 | Karsh BT, Beasley JW, Brown RL. Employed family physician satisfaction and commitment to their practice, work group, and health care organization. <i>Health Serv Res</i> . 2010;45(2):457-75.                                                                                                             | No examination of factors/associations with/determinants of quitting/intention to quit profession.                                                       |
| 53 | Kelley ML, Kuluski K, Brownlee K, Snow S. Physician satisfaction and practice intentions in Northwestern Ontario. <i>Can J Rural Med</i> . 2008;13(3):129-35.                                                                                                                                              | Not clear whether are GPs/PCPs.<br>Focus on remote rural retention.                                                                                      |
| 54 | Kerstein J, Pauly MV, Hillman A. Primary care physician turnover in HMOs. <i>Health Serv Res</i> . 1994;29(1):17-37.                                                                                                                                                                                       | No examination of factors/associations with/determinants of quitting/intention to quit profession.<br>Turnover between different employers.              |
| 55 | Kilmartin MR, Newell CJ, Line MA. The balancing act: key issues in the lives of women general practitioners in Australia. <i>Med J Aust</i> . 2002;177(2):87-9.                                                                                                                                            | No examination of factors/associations with/determinants of quitting/intention to quit profession.                                                       |
| 56 | Kirwan M, Armstrong D. Investigation of burnout in a sample of British general practitioners. <i>British Journal of General Practice</i> . 1995;45(394):259-60.                                                                                                                                            | No examination of factors/associations with/determinants of quitting/intention to quit profession.<br>Burnout but not associated with absence from work. |

|    |                                                                                                                                                                                                                                                            |                                                                                                                                                                                                    |
|----|------------------------------------------------------------------------------------------------------------------------------------------------------------------------------------------------------------------------------------------------------------|----------------------------------------------------------------------------------------------------------------------------------------------------------------------------------------------------|
| 57 | Kuusio H, Heponiemi T, Sinervo T, Elovainio M. Organizational commitment among general practitioners: a cross-sectional study of the role of psychosocial factors. <i>Scand J Prim Health Care</i> . 2010;28(2):108-14.                                    | No examination of factors/associations with/determinants of quitting/intention to quit profession.<br>Turnover between different employers.                                                        |
| 58 | Kuusio H, Heponiemi T, Vanska J, Aalto AM, Ruskoaho J, Elovainio M. Psychosocial stress factors and intention to leave job: differences between foreign-born and Finnish-born general practitioners. <i>Scand J Public Health</i> . 2013;41(4):405-11.     | No examination of factors/associations with/determinants of quitting/intention to quit profession.<br>Turnover between different employers.                                                        |
| 59 | Langballe EM, Innstrand ST, Aasland OG, Falkum E. The Predictive Value of Individual Factors, Work-Related Factors, and Work-Home Interaction on Burnout in Female and Male Physicians: A Longitudinal Study. <i>Stress and Health</i> . 2011;27(1):73-87. | Not clear whether are GPs/PCPs.<br>No examination of factors/associations with/determinants of quitting/intention to quit profession.<br>Burnout but not associated with absence from work.        |
| 60 | Lawrence J, Poole P. Career and life experiences of New Zealand women medical graduates. <i>N Z Med J</i> . 2001;114(1145):537-40.                                                                                                                         | <90% are GPs/PCPs and results for GPs not reported separately.<br>Career decisions and progression.                                                                                                |
| 61 | Leese B, Young R, Sibbald B. GP principals leaving practice in the UK. <i>European Jnl Gen Practice</i> . 2002;8(2):62-8.                                                                                                                                  | No examination of factors/associations with/determinants of quitting/intention to quit profession.<br>Examines leaving GP principal job for another GP job, factors for returning.                 |
| 62 | Linzer M, Manwell LB, Williams ES, Bobula JA, Brown RL, Varkey AB, et al. Working conditions in primary care: physician reactions and care quality. <i>Ann Intern Med</i> . 2009;151(1):28-36, W6-9.                                                       | <90% are GPs/PCPs and results for GPs not reported separately.<br>No examination of factors/associations with/determinants of quitting/intention to quit profession.                               |
| 63 | Lloyd JR, Leese B. Career intentions and preferences of GP registrars in Yorkshire. <i>Br J GP</i> . April 2006:280-2.                                                                                                                                     | No examination of factors/associations with/determinants of quitting/intention to quit profession.<br>Career decisions and progression.                                                            |
| 64 | Landon BE, Reschovsky JD, Pham HH, Blumenthal D. Leaving medicine: the consequences of physician dissatisfaction. <i>Med Care</i> . 2006;44(3):234-42.                                                                                                     | <90% are GPs/PCPs and results for GPs not reported separately.                                                                                                                                     |
| 65 | Lorant V, Geerts C, Duchesnes C, Goedhuys J, Ryssaert L, Remmen R, et al. Attracting and retaining GPs: a stakeholder survey of priorities. <i>British Journal of General Practice</i> . 2011;61(588):e411-8.                                              | <90% are GPs/PCPs and results for GPs not reported separately.<br>No examination of factors/associations with/determinants of quitting/intention to quit profession.<br>Retention and recruitment. |
| 66 | Luce A et al. What might encourage later retirement among general practitioners? <i>Journal of Management in Medicine</i> , 2002. 16(4/5): p. 303-310.                                                                                                     | No qualitative data                                                                                                                                                                                |
|    | Martin, S., E. Davies, and B. Gershlick, Under pressure: What the Commonwealth Fund's 2015 international survey of general practitioners                                                                                                                   | No qualitative data                                                                                                                                                                                |

|    |                                                                                                                                                                                                                                  |                                                                                                                                                                                |
|----|----------------------------------------------------------------------------------------------------------------------------------------------------------------------------------------------------------------------------------|--------------------------------------------------------------------------------------------------------------------------------------------------------------------------------|
|    | means for the UK. 2016, The Health Foundation: London. p. 37.                                                                                                                                                                    |                                                                                                                                                                                |
| 67 | Mayorova T, Stevens F, Scherpbier A, van der Velden L, van der Zee J. Gender-related differences in general practice preferences: longitudinal evidence from the Netherlands 1982-2001. <i>Health Policy</i> . 2005;72(1):73-80. | No examination of factors/associations with/determinants of quitting/intention to quit profession.<br>Career decisions.                                                        |
| 68 | McComb ED. Which psycho-demographic factors predict a doctor's intention to leave New Zealand general practice? <i>New Zealand Medical Journal</i> , 2008. 121 (1273): p.25-36                                                   | No qualitative data                                                                                                                                                            |
| 69 | McKinstry B et al. The feminization of the medical work force, implications for Scottish primary care: A survey of Scottish general practitioners. <i>BMC Health Services Research</i> , 2006. 6.                                | No qualitative data                                                                                                                                                            |
| 70 | Misra-Hebert AD, Kay R, Stoller JK. A review of physician turnover: Rates, causes, and consequences. <i>American Journal of Medical Quality</i> . 2004;19(2):56-66.                                                              | Not clear whether are GPs/PCPs.<br>No examination of factors/associations with/determinants of quitting/intention to quit profession.<br>Turnover between different employers. |
| 71 | Miedema B, Easley J, Fortin P, Hamilton R, Tatemichi S. Crossing boundaries: family physicians' struggles to protect their private lives. <i>Can Fam Physician</i> . 2009;55(3):286-7.e5.                                        | No examination of factors/associations with/determinants of quitting/intention to quit profession.                                                                             |
| 72 | Miedema B, Hamilton R, Fortin P, Easley J, Tatemichi S. The challenges and rewards of rural family practice in New Brunswick, Canada: lessons for retention. <i>Rural Remote Health</i> . 2009;9(2):1141.                        | No examination of factors/associations with/determinants of quitting/intention to quit profession.<br>Focus on remote rural retention.                                         |
| 73 | Moreno-Jiménez B, Gálvez-Herrer M, Rodríguez-Carvajal R, Vergel AIS. A study of physicians' intention to quit: The role of burnout, commitment and difficult doctor-patient interactions. <i>Psicothema</i> . 2012;24(2):263-70. | Not clear whether are GPs/PCPs.                                                                                                                                                |
| 74 | Myhre DL, Konkin J, Woloschuk W, Szafran O, Hansen C, Crutcher R. Locum practice by recent family medicine graduates. <i>Can Fam Physician</i> . 2010;56(5):e183-90.                                                             | No examination of factors/associations with/determinants of quitting/intention to quit profession.<br>Turnover between different employers.                                    |
| 75 | Norman P, Fitter M, Wall T. General practitioners' subjective experience of surgery workload. <i>Social Science and Medicine</i> . 1991 33(2). P.161-6                                                                           | No qualitative data                                                                                                                                                            |
| 76 | Nugent A, Black N, Parsons B, Smith S, Murphy AW. A national census of Irish general practice training programme graduates 1990-1996. <i>Irish Medical Journal</i> . 2003. 96 (1) p 10-12                                        | No qualitative data                                                                                                                                                            |
| 77 | Odom Walker K, Ryan G, Ramey R, Nunez FL, Beltran R, Splawn RG, et al. Recruiting and retaining primary care physicians in urban underserved communities: the importance of                                                      | <90% are GPs/PCPs and results for GPs not reported separately.                                                                                                                 |

|    |                                                                                                                                                                                                                                                                                     |                                                                                                                                                                                |
|----|-------------------------------------------------------------------------------------------------------------------------------------------------------------------------------------------------------------------------------------------------------------------------------------|--------------------------------------------------------------------------------------------------------------------------------------------------------------------------------|
|    | having a mission to serve. <i>Am J Public Health</i> . 2010;100(11):2168-75.                                                                                                                                                                                                        | No examination of factors/associations with/determinants of quitting/intention to quit profession.<br>Career decisions and progression.                                        |
| 78 | O'Kelly F, O'Kelly M, Ni Shuilleabhain A, O'Dowd T. A National Census of Irish General Practice Training Programme Graduates 1997-2003                                                                                                                                              | No qualitative data                                                                                                                                                            |
| 79 | Pathman DE, Konrad TR, Williams ES, Scheckler WE, Linzer M, Douglas J, et al. Physician job satisfaction, dissatisfaction, and turnover. <i>J. Fam Practice</i> . 2002;51(7):593.                                                                                                   | Not clear whether are GPs/PCPs.<br>Turnover between different employers.                                                                                                       |
| 80 | Pedersen AF, Andersen CM, Olesen F, Vedsted P. Risk of Burnout in Danish GPs and Exploration of Factors Associated with Development of Burnout: A Two-Wave Panel Study. <i>Int Jnl Fam Med</i> . 2013;2013:603713.                                                                  | No examination of factors/associations with/determinants of quitting/intention to quit profession.<br>Burnout but not associated with absence from work.                       |
| 81 | Plomondon ME, Magid DJ, Steiner JF, MaWhinney S, Gifford BD, Shih SC, et al. Primary care provider turnover and quality in managed care organizations. <i>Am J Manag Care</i> . 2007;13(8):465-72.                                                                                  | Not clear whether are GPs/PCPs.<br>No examination of factors/associations with/determinants of quitting/intention to quit profession.<br>Turnover between different employers. |
| 82 | Pit S and Hansen V. Factors influencing early retirement intentions in Australian rural general practitioners. <i>Occupational Medicine</i> , 2014;64, 297-304.                                                                                                                     | No qualitative data                                                                                                                                                            |
| 83 | Presseau J, Johnston M, Johnston DW, Elovainio M, Hrisos S, Steen N, et al. Environmental and individual correlates of distress: Testing Karasek's Demand-Control model in 99 primary care clinical environments. <i>British Journal of Health Psychology</i> . 2014;19(2):292-310. | <90% are GPs/PCPs and results for GPs not reported separately.                                                                                                                 |
| 84 | Putnik K, Houkes I. Work related characteristics, work-home and home-work interference and burnout among primary healthcare physicians: a gender perspective in a Serbian context. <i>BMC Public Health</i> . 2011;11:716.                                                          | No examination of factors/associations with/determinants of quitting/intention to quit<br>Burnout but not associated with absence from work.                                   |
| 85 | Qidwai W, Beasley JW, Gomez-Clavelina FJ. The present status and future role of family doctors : a perspective from the International Federation of Primary Care Research Networks. 2008.                                                                                           | No examination of factors/associations with/determinants of quitting/intention to quit profession.                                                                             |
| 86 | Rabatin J, Williams E, Baier Manwell L, Schwartz MD, Brown RL, Linzer M. Predictors and Outcomes of Burnout in Primary Care Physicians. <i>J Primary Care Community Health</i> . 2016;7(1):41-3.                                                                                    | No examination of factors/associations with/determinants of quitting/intention to quit profession.<br>Burnout but not associated with absence from work.                       |
| 87 | Rittenhouse DR, Mertz E, Keane D, Grumbach K. No exit: An evaluation of measures of physician attrition. <i>Health Services Research</i> . 2004;39(5):1571-88.                                                                                                                      | Not clear whether are GPs/PCPs.                                                                                                                                                |

|    |                                                                                                                                                                                                                                                |                                                                                                                                                                                                               |
|----|------------------------------------------------------------------------------------------------------------------------------------------------------------------------------------------------------------------------------------------------|---------------------------------------------------------------------------------------------------------------------------------------------------------------------------------------------------------------|
| 88 | Ruhe M, Gotler RS, Goodwin MA, Stange KC. Physician and staff turnover in community primary care practice. <i>J Ambulatory Care Manage.</i> 2004;27(3):242-8.                                                                                  | No examination of factors/associations with/determinants of quitting/intention to quit profession.<br>Turnover between different employers.                                                                   |
| 89 | Savageau JA, Ferguson WJ, Bohlke JL, Cragin LJ, O'Connell E. Recruitment and retention of primary care physicians at community health centers: a survey of Massachusetts physicians. <i>J Health Care Poor Underserved.</i> 2011;22(3):817-35. | <90% are GPs/PCPs and results for GPs not reported separately.<br>No examination of factors/associations with/determinants of quitting/intention to quit profession.<br>Turnover between different employers. |
| 90 | Schattner PL, Coman GJ. The stress of metropolitan general practice. <i>Med J Aust.</i> 1998;169(3):133-7.                                                                                                                                     | No examination of factors/associations with/determinants of quitting/intention to quit profession.                                                                                                            |
| 91 | Schofield DJ, Beard JR. Baby boomer doctors and nurses: demographic change and transitions to retirement. <i>Med J Aust.</i> 2005;183(2):80-3.                                                                                                 | Not clear whether are GPs/PCPs.<br>No examination of factors/associations with/determinants of quitting/intention to quit profession.                                                                         |
| 92 | Schofield DJ, Fletcher SL, Callander EJ. Ageing medical workforce in Australia--where will the medical educators come from? <i>Hum Resour Health.</i> 2009;7:82.                                                                               | No examination of factors/associations with/determinants of quitting/intention to quit profession.<br>Workforce planning data.                                                                                |
| 93 | Scott A, Gravelle H, Simoens S, Bojke C, Sibbald B. Job satisfaction and quitting intentions: A structural model of British general practitioners. <i>British Journal of Industrial Relations.</i> Vol 44, Issue 3, p.519-540                  | No qualitative data                                                                                                                                                                                           |
| 94 | Shaw S, Goplen G, Houston DS. Career changes among Saskatchewan physicians. <i>Can Med Assoc Jnl.</i> 1996;154(7):1035-8.                                                                                                                      | Not clear whether are GPs/PCPs.<br>No examination of factors/associations with/determinants of quitting/intention to quit profession.<br>Career decisions and progression.                                    |
| 95 | Shorer Y, Biderman A, Rabin S, Karni A, Levi A, Matalon A. Voluntary departure of family physicians from their workplace: A reflective outlook. <i>Israel Journal of Psychiatry and Related Sciences.</i> 2015;52(2):137-44.                   | Not clear whether each of four cases described involved leaving general practice. One is about returning to direct patient care. GP emotions around leaving examined not determinants for quitting.           |
| 96 | Sibbald, B., C. Bojke, and H. Gravelle, National survey of job satisfaction and retirement intentions among general practitioners in England. <i>BMJ</i> , 2003. 326(7379): p. 22.                                                             | No qualitative data                                                                                                                                                                                           |
| 97 | Shrestha D, Joyce CM. Aspects of work-life balance of Australian general practitioners: determinants and possible consequences. <i>Australian Journal of primary Health.</i> Vol 17, Issue 1, p.40-47                                          | No qualitative data                                                                                                                                                                                           |
| 98 | Simoens, S., A. Scott, and B. Sibbald, Job satisfaction, work-related stress and intentions to quit of Scottish GPs. <i>Scottish Medical Journal</i> , 2002. 47(4): p. 80-6.                                                                   | No qualitative data                                                                                                                                                                                           |

|     |                                                                                                                                                                                                                                  |                                                                                                                                                                                                           |
|-----|----------------------------------------------------------------------------------------------------------------------------------------------------------------------------------------------------------------------------------|-----------------------------------------------------------------------------------------------------------------------------------------------------------------------------------------------------------|
| 99  | Simoens S. Job satisfaction, intentions to quit, and the retention of GPs in England and Scotland. 2002.                                                                                                                         | No qualitative data                                                                                                                                                                                       |
| 100 | Simon AB, Alonzo AA. The demography, career pattern, and motivation of locum tenens physicians in the United States. <i>J Healthc Manag.</i> 2004;49(6):363-75; discussion 75-6.                                                 | Not clear whether are GPs/PCPs.<br>No examination of factors/associations with/determinants of quitting/intention to quit profession.<br>Career decisions and progression.                                |
| 101 | Solberg IB, Ro KI, Aasland O, Gude T, Moum T, Vaglum P, et al. The impact of change in a doctor's job position: a five-year cohort study of job satisfaction among Norwegian doctors. <i>BMC Health Serv Res.</i> 2012;12:41.    | <90% are GPs/PCPs and results for GPs not reported separately.<br>No examination of factors/associations with/determinants of quitting/intention to quit profession.<br>Career decisions and progression. |
| 102 | Solberg IB, Tómasson K, Aasland O, Tyssen R. The impact of economic factors on migration considerations among Icelandic specialist doctors: A cross-sectional study. <i>BMC Health Services Research.</i> 2013;13(1).            | <90% are GPs/PCPs and results for GPs not reported separately.<br>No examination of factors/associations with/determinants of quitting/intention to quit profession.                                      |
| 103 | Soler JK, Yaman H, Esteva M, Dobbs F, Asenova RS, Katic M, et al. Burnout in European family doctors: the EGPRN study. <i>Family Practice.</i> 2008;25(4):245-65.                                                                | No examination of factors/associations with/determinants of quitting/intention to quit profession.<br>Burnout but not associated with absence from work.                                                  |
| 104 | Statistical Bulletin. Statistics for general medical practitioners in England: 1994-2004. Department of Health Publications. 2005/02.                                                                                            | No examination of factors/associations with/determinants of quitting/intention to quit profession.                                                                                                        |
| 105 | Stearns J, Everard KM, Gjerde CL, Stearns M, Shore W. Understanding the needs and concerns of senior faculty in academic medicine: building strategies to maintain this critical resource. <i>Acad Med.</i> 2013;88(12):1927-33. | Not clear whether are GPs/PCPs.<br>Academic medicine.                                                                                                                                                     |
| 106 | Stevenson AD, Phillips CB, Anderson KJ. Resilience among doctors who work in challenging areas: a qualitative study. <i>British Journal of General Practice.</i> 2011;61(588):e404-10.                                           | No examination of factors/associations with/determinants of quitting/intention to quit profession.                                                                                                        |
| 107 | Sumanen M, Aine T, Halila H, Heikkila T, Hyppola H, Kujala S, Vanska J, Virjo I, Mattila K. Where have all the good GPs gone – where will they go? Study of Finnish GPs. <i>BMC Family Practice, Vol 13, pp 121</i>              | No qualitative data                                                                                                                                                                                       |
| 108 | Taylor DH, Quayle JA, and Roberts C. Retention of young general practitioners entering the NHS from 1991-1992. <i>British Journal of General Practice, 1999. 49(441): p. 277-280.</i>                                            | No qualitative data                                                                                                                                                                                       |
| 109 | Taylor DH, Jr., Leese B. Recruitment, retention, and time commitment change of general practitioners in England and Wales, 1990-4: a retrospective study. <i>BMJ.</i> 1997;314(7097):1806-10.                                    | No examination of factors/associations with/determinants of quitting/intention to quit profession.                                                                                                        |

|     |                                                                                                                                                                                                                           |                                                                                                                                                                                                           |
|-----|---------------------------------------------------------------------------------------------------------------------------------------------------------------------------------------------------------------------------|-----------------------------------------------------------------------------------------------------------------------------------------------------------------------------------------------------------|
| 110 | Taylor DH, Jr., Leese B. General practitioner turnover and migration in England 1990-94. <i>British Journal of General Practice</i> . 1998;48(428):1070-2.                                                                | No examination of factors/associations with/determinants of quitting/intention to quit profession.<br>Turnover between different employers.                                                               |
| 111 | Taylor DH, Esmail A. Retrospective analysis of census data on general practitioners who qualified in South Asia: who will replace them as they retire? <i>BMJ</i> . 1999;318:306-10.                                      | No examination of factors/associations with/determinants of quitting/intention to quit profession.<br>Workforce planning.                                                                                 |
| 112 | Taylor K, Lambert T, and Goldacre M, Future career plans of a cohort of senior doctors working in the National Health Service. <i>Journal of the Royal Society of Medicine</i> , 2008. 101(4): p. 182-190.                | No qualitative data                                                                                                                                                                                       |
| 113 | Taylor K, Lambert T, Goldacre M. Future career plans of a cohort of senior doctors working in the National Health Service. <i>Journal of the Royal Society of Medicine</i> . 2008;101(4):182-90.                          | Not clear whether are GPs/PCPs.<br>Career decisions and progression.                                                                                                                                      |
| 114 | Taylor KS, Lambert TW, Goldacre MJ. Career progression and destinations, comparing men and women in the NHS: postal questionnaire surveys. <i>BMJ</i> . 2009;338:b1735.                                                   | No examination of factors/associations with/determinants of quitting/intention to quit profession.<br>Career decisions and progression.                                                                   |
| 115 | Taylor K, Lambert T, Goldacre M. Career destinations, views and future plans of the UK medical qualifiers of 1988. <i>Journal of the Royal Society of Medicine</i> . 2010;103(1):21-30.                                   | <90% are GPs/PCPs and results for GPs not reported separately.<br>No examination of factors/associations with/determinants of quitting/intention to quit profession.<br>Career decisions and progression. |
| 116 | The Royal New Zealand College of General Practitioners. 2015 Workforce Survey                                                                                                                                             | No qualitative data                                                                                                                                                                                       |
| 117 | Thommasen HV, Lavanchy M, Connelly I, Berkowitz J, Grzybowski S. Mental health, job satisfaction, and intention to relocate. Opinions of physicians in rural British Columbia. <i>Can Fam Physician</i> . 2001;47:737-44. | Not clear whether are GPs/PCPs.<br>Focus on remote rural retention.<br>Burnout but not associated with absence from work.                                                                                 |
| 118 | Thornett A, Cobb S, Chambers R, Mohanna K. Accessing careers support in primary care. <i>Education for Primary Care</i> . 2005;16(1):66-73.                                                                               | Not clear whether are GPs/PCPs.<br>Career decisions and progression.                                                                                                                                      |
| 119 | Toyry S, Kalimo R, Aarimaa M, Juntunen J, Seuril M, Rasanen K. Children and work-related stress among physicians. <i>Stress and Health</i> . 2004;20(4):213-21.                                                           | Not clear whether are GPs/PCPs.<br>No examination of factors/associations with/determinants of quitting/intention to quit profession.                                                                     |
| 120 | Van Greuningen M, Heiligers PJ, Van der Velden LF. Motives for early retirement of self-employed GPs in the Netherlands: a comparison of two time periods. <i>BMC Health Services Research</i> . Vol 12, p.467            | No qualitative data                                                                                                                                                                                       |
| 121 | Virtanen P, Oksanen T, Kivimaki M, Virtanen M, Pentti J, Vahtera J. Work stress and health in primary health care physicians and hospital physicians. <i>Occup Environ Med</i> . 2008;65(5):364-6.                        | No examination of factors/associations with/determinants of quitting/intention to quit profession.                                                                                                        |



|     |                                                                                                                                                                                                         |                                                                                                                                                                      |
|-----|---------------------------------------------------------------------------------------------------------------------------------------------------------------------------------------------------------|----------------------------------------------------------------------------------------------------------------------------------------------------------------------|
|     |                                                                                                                                                                                                         | Examines differences between GPs and consultants not factors leading to long term sickness.                                                                          |
| 122 | Wainer J. Work of female rural doctors. Aust J Rural Health. 2004;12(2):49-53.                                                                                                                          | No examination of factors/associations with/determinants of quitting/intention to quit profession.                                                                   |
| 123 | Woodward CA, Ferrier B, Cohen M, Brown J. Professional activity. How is family physician's work time changing? Canadian Family Physician. Volume 47, p.1414-21                                          | No qualitative data                                                                                                                                                  |
| 124 | Wordsworth S, Skatun D, Scott A, French F. Preferences for general practice jobs: a survey of principals and sessional GPs. British Journal of General Practice. 2004;54(507):740-6.                    | No examination of factors/associations with/determinants of quitting/intention to quit profession.<br>Career decisions and progression.                              |
| 125 | Xu G, Veloski JJ, Hojat M, Fields SK. Physicians' intention to stay in or leave primary care specialties and variables associated with such intention. Eval Health Prof. 1995;18(1):92-102.             | <90% are GPs/PCPs and results for GPs not reported separately.<br>No examination of factors/associations with/determinants of quitting/intention to quit profession. |
| 126 | Young, R., B. Leese, and B. Sibbald, Imbalances in the GP labour market in the UK: Evidence from a postal survey and interviews with GP leavers. Work, Employment and Society, 2001. 15(4): p. 699-719. | No qualitative data                                                                                                                                                  |
| 127 | Croft, M. (2016). "First 5's in Cornwall - what are their intentions and what influences their career choices?" (Unpublished)                                                                           | Unpublished (Survey conducted by a GP Academic Trainee research project)                                                                                             |

## **Appendix 4 – Summary of patient involvement in thematic analysis and explanatory model**

The following Patient Involvement discussion points provided colloquial real world perspectives that contextualised our understanding of our literature-based thematic analysis and associated explanatory model.

### **Flexible Working**

While flexible working can bring benefits to individual GPs (young and old) such as freedom from paper work and freedom to pursue other interests, it can increase workload for other practice GPs if they have difficulty recruiting other partner GPs or locums. Discussion with our PPI group suggested that flexible working can have a potentially negative effect on patients who seek appointments with the same GP that they know and have built history and rapport with. If they are consistently inaccessible to them because of their flexible working patterns, patients may experience grief at the loss of the relationship. This could have implications for the NHS as there may be more referrals to secondary care as a consequence. In such circumstances, it is often more acceptable to the patient if the GP retires as this is a predictable and understandable reason for the end of the doctor-patient relationship.

While increasing the availability of locums may relieve pressure on full-time GPs and aid retention of salaried GPs / partners, there was concern from the PPI group that GPs who preferred to travel between GP practices working as locums may choose to do so because it means that they avoid building Doctor - patient relationships. Different personalities may suit different working styles, with permanent salaried GPs / partners having different values and personalities to locums and perhaps valuing the doctor-patient relationship higher.

### **Continue and Cope**

While GPs talk in the semi-structured interviews about strategies that help them to cope with increasing workload and pressures, members of the PPI group note that there is no mention of destructive “coping strategies” such as mis-using alcohol or drugs and no mention of GP use of anti-depressants. There is also no reporting of GPs accessing counselling services in the interviews.

### **Viability of Early Retirement**

The PPI group expressed the view that the GP Cultural norm of acceptability of early retirement may be compounded further by GPs expert knowledge about the human body. Because GPs are more able to predict expected deterioration with age, they may be more likely to plan for early retirement so that they can physically do the things they enjoy.

### **Ageing**

The PPI group noted that holiday entitlement is not mentioned in any of the GP interviews and suggested increased holiday entitlement for aging GPs may help GPs manage their natural fatigue and ultimately improve retention.

### **Partnership Issues**

The qualitative synthesis and explanatory model in this review highlights the importance of good practice relationships for GP retention. When these are not in place, GPs can experience a lack of support which may lead to quitting. The PPI group note that different GPs with different

personalities / values / working styles may experience conflict when working together in the same practice. PPI members consider GPs to be naturally competitive and prone to compare themselves to each other. A more sociable patient-focused GP may have a different working style to a more "efficient" target-focused GP and the target focused GP may comment negatively on such differences.

### **Commitment and Investment**

The qualitative synthesis highlights the uncertainty around future commitment to investing in future GP practice. The PPI group notes that GPs are a risk adverse people who are driven by financial security. They suggest that younger GP coming out of medical school with financial debts may be less inclined to take on the financial risk of becoming a partner especially with the negative media portrayal and general uncertainty. The PPI group note that salaried GPs are better off than partners as they do not have the financial risks associated with being a partner, and the PPI group pose the question 'Would all GPs prefer to be salaried? Could this be a way forward?'

The qualitative synthesis highlights concerns about the difficulties of recruiting new partners to a GP practice to replace a retired GP partner. Because GP practices are independent businesses, GP partners are needed. However, younger GPs may be reluctant to take on partnerships because of the added responsibilities involved. The PPI group note that practice environment / demographic may impact on GP recruitment, with smaller practices suffering most. The PPI group also expressed the view that many GPs may not have good business skills or be trained in HR, and consequently may not be skilled in interviewing and recruitment. They may be less likely to take a professional approach to legal things e.g. signing contracts, with some preferring to do things "on trust" and hence deny/hide/ignore commitment issues.

### **Impact of Organisational Changes**

#### **Referrals**

Complex referral systems, more specialised hospitals and delays in communication contribute to GPs experience of fragmentation and a depersonalised healthcare system. (Campbell et al. 2015) (11). The PPI group confirm that in their experiences there is poor linking of secondary and primary care. They observe that decisions to change medications / dose are made in secondary care by nurses and pharmacists and that there is much more choice available in secondary care. When patients then comes back under the responsibility of the GP, the GP may not be familiar with the drug(s) prescribed. This responsibility coupled with a lack of knowledge may cause stress. It was noted by the PPI group that GPs were naturally proud and so less able to admit it if they do not know something and this may compound the issue.

#### **Doctor-Patient relationship**

The qualitative synthesis indicates that lack of time with patients means the ability to practise patient-centred continuity of care is compromised. This impacts the GPs' professional autonomy and values, resulting in diminished job satisfaction for GPs and diminished satisfaction for patients. The PPI group noted how important and valued by patients doctor-patient rapport and personalised knowledge was, and how this could sometimes result in increased efficiency with respect to referrals. They explain how a GP who knows a patient's history and who has a good rapport may be more likely to prescribe a drug / therapy already prescribed that might reduce the need for secondary care. Such GPs may also make appropriate and timely referrals to secondary care based on a patients' request and their knowledge of the patient's history.

## Patients' Demands

The qualitative synthesis indicates that patient demand (increased number and increased expectations) coupled with a shortage of GPs and available appointments is adding to a feeling of increased pressure which is making some GPs consider retiring. Patient demands may be higher if GP practices are situated in areas of higher deprivation with populations with multiple health and social problems and working with elderly populations with multiple comorbidities and social care needs (Campbell et al., 2015) (11).

The PPI group note that patient demands may also be higher in multicultural communities as they may require more skilled communication from the GPs. The PPI group also note that patients are often ill-informed about how a practice works and so may be unknowingly wasting time and adding to GP pressure. They suggest this could be avoided if patients were provided with information about the structure and function of the practice and were guided in how to most efficiently engage with the practice.

## Practice Demands

The qualitative synthesis indicates that GPs in smaller practices were more likely to feel trapped between continuing to work full-time under extreme pressure in order to support colleagues, or to retire completely. Difficulty in recruiting locums precluded many from working part-time. In an unsupportive environment, having to take on the responsibility for a partner's absence, ill health, or early retirement can add to feelings of burden and stress. Whereas, in the more supportive practice, such scenarios are better managed by the team (Campbell et al., 2015) (11).

The PPI group commented on the finding (from the review of survey studies) that GPs working in very small and in large practices (more than 10 partners) are more likely to quit, with medium sized practices more likely to retain GPs. They suggest that this could be down to smaller practices being less able to adapt and being more reactive, while larger practices do not have the strong relationships in place to support the GPs as larger practices may be less able to get everyone together at the same time and there may be less opportunity for communication and relationship building. Consequently, GPs in large practices may feel "invisible", not "part of something" and so less loyal.

## Professional Culture

### Acceptability of early retirement

In the qualitative synthesis, GPs describe a permeating "bullying culture" from the top down and the PPI group acknowledge this and confirm a culture of government bullying via NHS England to salaried GPs. The PPI group think that this is one of the reasons why autonomy is so important to GPs. They also note a historical precedence for GPs to be independent and autonomous due to GP clinics traditionally being operated from a GP's living room. The PPI group describe how sometimes practice managers may be strong characters with too much influence over the practice GPs. They suggest that better training in HR and interviewing for GPs may aid recruiting and could potentially avoid such circumstances.

## Appendix 5 - Australian case study of part-time working

This section separately presents findings of the only included qualitative interview study that was with GPs outside the UK (18). As well being conducted in a different context to the UK studies, the narrower specific focus of this study was on the reasons that Australian GPs preferred to 'work sessionally' – that is part-time (in this study, six or fewer sessions per week).

### Flexible working

In this study, many of the GPs "working sessionally" in Australia said that they did so in response to the changing nature of clinical practice, where they were required to work with more complex patients, often with chronic conditions and associated psychological symptoms. Many of the GPs in this study felt that a mix of clinical, non-clinical and unpaid activities attenuated the tiredness one might otherwise feel when working with such patients and allowed more time for being conscientious e.g. reviewing all the patient records before writing a complex referral and providing lots of information. Sessional GPs working in Australia reported that they recognised that "inner resources" were central to providing good quality care, especially when working with complex patients.

Concerns about working flexibly included remuneration, which was considered modest. Also, several GPs found it slightly more difficult to keep up to date clinically.

### Continue and cope

The Australian study may offer a different perspective on why some GPs find it easier to cope and continue in the system. One GP suggests that GPs able to adapt to the changing health system may only be able to do so because they are less conscientious. 'If you are doing general practice well clinically, it is quite challenging. I have seen a lot of lazy GPs that palm things off' (Dwan et al., 2014) (18).

### Alternative roles

All of the Australian sessional GPs interviewed were in full-time paid employment in health related areas, including education and training, policy, research and academia and medical specialities. All of the interviewed GPs stated that "life's less boring" and "more clinically sustainable and interesting" with flexible work practices.

### Doctor-patient relationship

The authors report that the majority of sessional GPs in the study acknowledged increased complexity in treating patients, with a perceived shift away from traditional "disassociated problem solving" involving a mix of semi-acute and chronic care, towards the management of multiple, chronic diseases.

### Patient demands

Australian GPs reported that the prevalence of complex, chronic illness and the increasing need for psychological management meant that consultations were time consuming and exhausting. 'Most of my patients ... wouldn't be happy if you just printed out a script and handed it to them ... What might happen if you do take antibiotics? What might happen if you don't take the antibiotics? [What are] the reasons for taking it? [What are] the reasons not for taking it, you know? I think that takes up a lot of time and I think that's quite exhausting' (Dwan et al., 2014) (18).

## Lack of support

Lack of perceived support towards GPs from the media appears not to be limited to the UK. Australian media portrayal of sessional GPs was reported to be also critical, suggesting that GPs working less than full-time reflected a lack of commitment and that sessional clinical practice is a personal indulgence that disregards the needs of the community.

## Job satisfaction

In this study, many of the GPs reported feeling that full-time general practice did not allow them to be the best GP they could be.

'[Like] most GPs I want to do a decent job, and I actually always found that if I go beyond a certain number of sessions I don't think I am doing a decent job anymore' (Dwan et al., 2014) (18)

## Wellbeing

Similar dynamics in wellbeing experienced by UK GPs were expressed by sessional GPs in Australia.

The strain of full-time clinical practice was reported to strongly influence many Australian GPs' decisions to work part-time. Sessional clinical practice was seen to offer "downtime", the opportunity to "recharge your batteries". It kept them "fresh," provided time to "catch your breath", and allowed GPs to "maintain good mental and physical health". Therefore, many of the GPs felt that a mix of clinical, non-clinical and unpaid activities attenuated the tiredness one might otherwise feel in full-time clinical practice.

## Work-life balance

Cultural influences on work-life balance may be particularly strong. In UK studies, there was no clear gender bias reported for GPs choosing to work less than full-time, with Hutchins et al (14) reporting that GPs of both genders wished to adjust their working hours. However, in this Australian study, the authors suggest that gender strongly influenced female participant's decisions to work less than full-time. Thirteen female GPs and one male GP had dependent children, but only the man did not mention his children or family during the interview. Three of the mothers commented that their spouse's employment required them to work sessionally in order to manage the household and caring responsibilities. A further two women with adult children had significant caring responsibilities

## Appendix 6 - Results of quality assessment

|                                                                                                                                | Newton 2004 | Hutchins<br>2005 | Campbell<br>2015 | Sansom 2016 | Doran 2016 | Dwan 2014 | Ipsos MORI,<br>2015 |
|--------------------------------------------------------------------------------------------------------------------------------|-------------|------------------|------------------|-------------|------------|-----------|---------------------|
| 1) Is the research question clear?                                                                                             | Y           | Y                | Y                | Y           | Y          | Y         | Y                   |
| 2) Is the theoretical or ideological perspective of the author (or funder) explicit?                                           | N           | N                | N                | N           | N          | Y         | N                   |
| 2b) Has this influenced the study design, methods or research findings?                                                        | CT          | CT               | CT               | CT          | CT         | N         | CT                  |
| 3) Is the study design appropriate to answer the question?                                                                     | Y           | Y                | Y                | Y           | Y          | Y         | Y                   |
| 4) Is the context or setting adequately described?                                                                             | N           | N                | Y                | Y           | Y          | Y         | N                   |
| 5) Is the sample adequate to explore the range of subjects and settings, and has it been drawn from an appropriate population? | CT          | Y                | Y                | Y           | Y          | Y         | Y                   |
| 6) Was the data collection adequately described?                                                                               | Y           | N                | Y                | Y           | Y          | N         | N                   |
| 7) Was data collection rigorously conducted to ensure confidence in the findings?                                              | CT          | CT               | Y                | Y           | Y          | Y         | CT                  |
| 8) Was there evidence that the data analysis was rigorously conducted to ensure confidence in the findings?                    | Y           | Y                | Y                | Y           | Y          | Y         | N                   |
| 9) Are the findings substantiated by the data?                                                                                 | Y           | Y                | Y                | Y           | Y          | Y         | CT                  |
| 10) Has consideration been given to any limitations of the methods or data that may have affected the results?                 | N           | Y                | Y                | Y           | Y          | Y         | N                   |
| 11) Do any claims to generalisability follow logically and theoretically from the data?                                        | Y           | N                | Y                | Y           | Y          | Y         | CT                  |
| 12) Have ethical issues been addressed and confidentiality respected?                                                          | CT          | Y                | Y                | Y           | Y          | Y         | Y                   |
| 13) Is/are the author/s reflexive?                                                                                             | N           | N                | N                | N           | N          | N         | N                   |

Key: Y = Yes, N = No, CT = can't tell. Questions are from tool originally published by Wallace et al (9)

## **Appendix 7 - Textual thematic analysis**

### **Undoable / Unmanageable**

#### **Workload (administration)**

All six UK semi-structured interview studies contributed to the theme “workload”

GPs in one study describe often working 12 or more hours per day, and that this was having a significant impact on their ability to do their role and live their lives (16). GPs describe increased administration, both non-clinical and associated with secondary care, preparing for Care Quality Commission (CQC) visits, management targets, regulations and guidelines (11). This caused stress and reduced job satisfaction and was a factor in GPs decisions to leave practice early. Many GPs who had continued in practice beyond the age of sixty had done so because they had been able to delegate paperwork. Alleviation of administration emerged as a high priority for GPs (14).

#### **Pressures**

All six UK semi-structured interview studies contributed to the theme of “pressures”.

#### ***Fear of making mistakes***

Time pressure and conflicting priorities meant that some interviewed GPs felt that the care they were giving was sub-standard, leading to disillusionment and a raised anxiety about the risk of making a mistake.

#### ***Patient demands***

In one study, GPs said demand for patient care was outstripping supply. Contributing factors cited included unrealistic patient expectations arising from patient access to online information about their symptoms while simultaneously being less willing to treat themselves (16). Others describe an increase in the number of patient contacts without a corresponding increase in the number of GPs; and additional workload from secondary care (12).

The pace and complexity of work was felt to be difficult to maintain. GPs felt patient demands may be higher if GP practices were situated in areas of higher deprivation where populations may have many have multiple health and social problems, or in areas with elderly populations with multiple morbidities and social care needs (11) or in areas with high numbers of asylum seekers (14).

GPs report how lack of time with patients corresponded to decreased job satisfaction. “I think what’s not so enjoyable now is that actually you are not able to meet people’s demands” (Hutchinson 2005) (14).

#### ***Practice demands (GP shortages and others working reduced hours)***

GPs in smaller practices were reported to be more likely to feel trapped between continuing to work full-time under extreme pressure in order to support colleagues, or to retire completely. However, difficulty in recruiting locums precluded many from working part-time. In an unsupportive practice environment, it was felt that having to take on the responsibility for a practice partner’s absence, ill health, or early retirement contributed to feelings of burden and stress. In contrast, in more supportive practices, it was felt that such scenarios are better managed by the team (11).

#### ***Training and resources***



GPs report feeling placed in a stressful situation of trying to meet raised patient expectations with insufficient resources and with increased workload being compounded by inadequate training and information technology resources, and thought this may particularly impact older GPs experiencing reductions in stamina and physical limitations. Deteriorating eyesight was noted by three GPs in one study (11), however, computer systems seemed unable to accommodate accessibility issues such as the need for a larger font or fewer icons on the screen.

## **Morale**

### **Identity / Perceived value of GP work**

Five UK semi-structured interview studies (11, 12, 14, 16, 17) contributed to the theme “identity / perceived value”

GPs describe feeling undervalued by both patients and politicians. One GP described feeling how increased patient demand coupled with GP shortages resulted in the perception of the NHS as a “failing brand” in the eyes of the public (Campbell et al 2015) (11).

### **Professional Culture**

Five UK semi-structured interview studies (11, 12, 14, 16, 17) contributed to the theme “professional culture”.

### **Acceptability of early retirement**

GPs report feeling that it is common and acceptable amongst their peers to consider and financially plan to take early retirement and, with this in mind, many GPs have made long-term financial plans to make this happen.

### **Cultural shift**

Authors of one study (15) describe GPs trained for a traditional model of general practice who may struggle to adapt to the current one which sees the GP as one member of a multidisciplinary team commissioned to deliver national standards of care. The introduction of payment-related government targets was reported to have impacted on the “moral values” fundamental to general practice of some GPs: ‘The government has bred a conniving species of GP ... To an extent you do care about your patients, and you do do your best for them because it’s your job ... but you’ve no longer got any incentive to do anything more than that’ (Hutchins 2005) (14).

### **Bullying top-down culture**

GPs describe a permeating “bullying culture”

‘There is a really aggressive, vicious, bullying culture that permeates management in the NHS. That then flows all the way down to whoever your locality middle-managers are’ (Doran et al., 2016) (17).

### **Lone working**

GPs said that an unintended consequence of having longer and more intense working days was the limited contact with colleagues and sense of isolation that this could cause. This impacted on practice culture of family practices that had traditionally generated positive and supportive work environments (16). GPs said that where practice level support isn’t evident, or the GP doesn’t feel supported, it can make for an ‘everyone for themselves’ culture where the decisions about when to leave are based more on self-survival than what is best for the practice.

### **Lack of support**

Five UK semi-structured interview studies (11, 12, 15-17) contributed to the theme “lack of support”

#### ***Government / political***

GPs thought more is expected of GPs with lower financial resources and less support in place. Some GPs described being “at the front end of a service unable to deliver what it promises” (Newton, 2004) (15). GPs describe organisational changes resulting in a clash of values and diminishing professional autonomy, as health care became more centralised, standardised, and depersonalised.

#### ***Negative media portrayal***

Some GPs felt misrepresented by the media and felt frustrated that the more positive aspects of their hard work and professionalism went largely unreported. Being the subject of an ongoing and negative media campaign left many feeling undermined and demoralised:

‘We were targeted in a completely unsympathetic light [...] without any recognition of what as a profession we gave to the public really and it did, over time, become very wearing’ (Doran et al., 2016) (17).

### **Job Satisfaction**

Five UK semi-structured interview articles contributed to the theme of “job satisfaction” (11, 12, 14, 15, 17).

Job satisfaction was stated to be a major factor in determining the retirement plans of GPs.

Doran et al report GPs in their study, particularly those with 10 years or more practice experience, feeling their job was not meeting their expectations and there was a loss of intellectual challenge. Many GPs felt the level of satisfaction they were able to derive from general practice had declined considerably as a result of increased government regulation and bureaucratic pressure.

In some cases, GPs describe how they grew to hate their job, or hated “everything around their job”. One former GP described:

‘Passionately adoring my work and my patients, I mean, really I can’t tell you how much I miss them. Absolutely loved the actual job, but everything around the job I hated’ (Doran et al., 2016) (17).

### **Wellbeing**

All six UK semi-structured interview articles contributed to the theme of “wellbeing”.

Many GPs describe themselves as being near burnout (16). Feelings of being overwhelmed, stressed, and losing confidence were also mentioned. One GP described the vicious circle of doctors getting sick, this placing increased pressure on the remaining doctors, who then themselves get sick (11). Time pressure was cited as a factor for GPs not addressing their own health needs:

‘looking after their own well-being was ‘just one more thing to fit in’, and GPs were reluctant to visit their own doctor due to not wanting to be a ‘nuisance patient’ and an awareness that ‘they’re going through the same suffering as you are’ (Sansom et al., 2016) (12).

GP burnout also has implications for the quality of patient care, as described by a GP appraiser:

'As GPs got more and more exhausted and burnt out, there was this "I don't want to know", there was this disassociation, there was this lack of will to fight to get what patients needed' (Doran et al., 2016) (17).

Such impacts on the quality of care and the experience of providing care may in turn reinforce patient dissatisfaction and further lower job satisfaction.

### **Work-life balance**

Five interview studies with UK GPs contributed to the theme of "work-life balance" (11, 12, 14, 15, 17).

Issues relating to quality of working life, rather than increased remuneration, emerged as one of the most important factors influencing retention. GPs of both genders wished to adjust their working hours and planned retirement to spend more time with partners and family in the UK. Many stated that the provision of part-time work within their practices was important to enable retention beyond retirement to reduce the pressure of work for that individual, and to enable them to pursue interests they enjoyed. GPs with high job satisfaction said that although they like their job, they felt it encroached on their lives outside work and that they wanted to enjoy hobbies and other interests whilst they were young enough to do so.

## **Impact of Organisational Changes**

### **Referral volume and complexity**

Five UK semi-structured interview studies (11, 12, 14, 16, 17) contributed to the theme "referrals".

GPs report changes to referral systems resulting in a shift in work load from hospital to primary care, combined with changes in patient demographics and demand. Patient pathways are perceived to be more complex and time-consuming due to "unrealistic expectations of patients" and "hospital doctors lacking resources". Complex referral systems, with hospitals that focus increasingly on specialised medical needs and delays in communication contribute to GPs' experience of fragmentation and a depersonalised healthcare system (11).

### **Targets and assessments**

Five UK semi-structured interview studies (11, 12, 14, 16, 17) contributed to the theme "targets and assessments".

GPs report feeling that management targets, regulations and guidelines increased workload burden (paperwork and bureaucracy) and contribute to stress and loss of job satisfaction. Introduction of the Quality and Outcomes Framework (QOF) was felt by some to be a "tick box exercise" which impacted adversely on the doctor-patient relationship.

'You spent more time ticking boxes than you did talking to the patients sometimes [...] that put more stress on me and I felt it affected my rapport with the patients' (Doran et al., 2016) (17).

Such monitoring and targets were reported by some older GPs as reflecting a lack of trust and amounting to "micromanagement" from the government.

### **Doctor-patient relationship**

All six UK semi-structured interview studies contributed to the theme of "doctor-patient relationship."

GPs reported feeling that the pressures introduced by “impossible targets” and “unrealistic appointment times” had changed the very hallmark of general practice: the doctor-patient relationship. Lack of time with patients meant the ability to practise patient-centred care and continuity of care was perceived to be compromised. As a result, GPs’ professional autonomy and values were felt to be undermined, resulting in diminished job satisfaction for GPs and diminished satisfaction for patients.

### **Changing role**

All six UK semi-structured interview studies contributed to the theme of “changing role”.

#### **Responsibility**

GPs reported feeling that an increase in responsibility alongside organisational changes had occurred: ‘Cases were getting more complicated, more was being transferred from the responsibility of the hospital to the responsibility of GPs [...], I was spending more and more time doing administrative things and less and less time being able to devote my mental attention to the patients in front of me’ (Doran et al., 2016) (17).

#### **Non-clinical work**

Many felt undervalued and their role had been diminished to a ‘government clerk’ or a ‘data clerk for public health and for management’ (17). The GMS contract (2004) was seen to have exacerbated this diminution in role. GPs who continued to practice beyond retirement age had often done so because they had been able to delegate their paperwork, leaving more time for patient consultation, the aspect of general practice they enjoyed.

#### **Rate of change**

“Change” was cited as a reason by many GPs for wanting to leave general practice.

Many GPs describe becoming progressively worn down by change over a time period, which several of them said had started in 1990 (15) and that this contributed to low morale. Moreover, difficulties were experienced with perceiving the value of changes, many of which were felt to have been made with no long term vision and for “little health gain”. One GP suggested that more conscientious GPs and older GPs might be less able to adapt and cope with change, and that tolerance to change diminished the longer a GP has been in practice.

#### **Autonomy and Control**

Five UK semi-structured interview studies contributed to the theme “autonomy and control”.

GPs described how increased government regulation and bureaucratic pressure has led many GPs to feel an erosion of autonomy and professional control, impacting job satisfaction.

#### **Reaccreditation**

Two UK semi-structured interview studies (one ten years older than the other) (12,14) contributed to the theme “reaccreditation”. GPs expressed mixed views about the appraisal and revalidation system. Some found appraisals valuable and helpful and highlighted areas to strengthen through professional development, while others felt they were an additional burden and ineffective (12). Some GPs felt strongly that they should not be exempt from re-accreditation if they continue to work beyond retirement age to ensure competence. However, other GPs mentioned that they would schedule their retirement earlier to avoid their next revalidation.

## Projected Future

### Viability of early retirement

Three UK semi-structured interview studies (11, 12, 15) contributed to the theme “viability of early retirement”.

Cultural norms of early retirement coupled with good pension provision appear to encourage part-time working and early retirement for GPs in the UK. The 1995 section of the NHS Pension Scheme and so-called ‘24-hour retirement’ were cited by GPs as a way to achieve early retirement (and/or reducing hours) whilst still receiving an adequate income.

GPs with low job satisfaction reported being more likely to plan to leave as soon as they were financially able. For this dissatisfied group, no manner of practical incentives or inducements would keep them at work:

‘the more money you gave me the quicker I would be able to retire’ (Newton 2004) (15).

### Ageing

Four UK semi-structured interview studies (11, 12, 14, 17) contributed to the theme of “ageing”.

#### Cognitive deterioration and fear of incompetency

Some GPs described how cognitive and physical limitations (e.g. deteriorating eye sight) experienced as they got older gave rise to feelings of anxiety and lack of confidence as they feared “unconscious incompetence”. Some were concerned that their poorer memory could mean they would be unable to keep up to date. Some GPs recognised their memory and capacity for learning was declining, and said that they would not want to continue in practice if their capacities were inadequate (14).

#### Resilience

GPs describe feeling that as you get older and stamina decreases, the length of the day is very exhausting and this can impact on GPs’ confidence and ability and, consequently, their perceived capacity to continue working in direct patient care.

‘There seems to be something that happens when you reach about 55: you start to get feelings of struggling with the work and 60 feels an awful long way away.’ (GP interviewee in Campbell et al., 2015) (11).

Feelings of tiredness may be compounded for some female GPs who may experience sleep disturbance during the menopause (12).

#### Investment and commitment

Five UK semi-structured interview studies contributed to the theme of “investment and commitment” (11, 12, 14, 15, 17).

#### Partnership issues

GPs reported that poor relationships between older and younger partners arising from differences in values or perspectives could lead to opposing views about how the practice should be run.

'... it had reached the point where we had young new members who, for their own reasons needed their protected time but hadn't thought through the impact that can have on the rest of the team. You reach a crossroads that says: 'Hang on, I can't mop this up'' (Newton, 2004) (15).

Such tensions resulted in GPs feeling unsupported, less loyal to their practice and having a decreased likelihood of staying on (12). Practice-level changes, such as peers retiring, could also contribute to decisions to leave:

'We've just had three more retirements so nearly all the people who were around when I started have now gone and been superseded by younger, different GPs ... my work satisfaction is less and I think a large part of it is because of the changing style of work: the newer doctors work differently. I don't like the way they do it' (GP interviewee in Sansom et al., 2016) (12).

### **Long-term responsibility**

Concerns were evident, of current difficulties of recruiting new partners to a GP practice to replace a retired GP partner (12). However, GPs reported that younger GPs may be reluctant to take on partnerships because of the added risks and responsibilities involved.

### **Financial investment**

GPs reported that concern about the future of general practice meant they may be less likely to invest in buildings and make long term commitments.

## **Multiple Options and Strategies**

### **Flexible working / Reducing working hours**

Five UK semi-structured interview studies (11, 12, 14-16) contributed to the theme "flexible working / reducing working hours".

GPs report that while flexible working can bring benefits to individual GPs (young and old), it can increase workload for other GPs if there is difficulty recruiting other partners or locum GPs. This pressure is more keenly felt in smaller practices, with GPs more likely to feel trapped between continuing to work full-time under extreme pressure in order to support colleagues, or to retire completely.

### **Continue and cope**

Four semi-structured interview studies (11,12,15,17) contributed to the theme "continue and cope".

GPs report that they don't foresee their working situation improving and they vary in their ability to cope (11). GPs said resilience to change, or ability to adapt, may be linked to personality type; one GP describes being an experienced GP with a "robust" personality and "cultivating particular frames of mind" while another talks about having "an enormous amount of experience" and "the right type of personality"(11, 15). Practical coping strategies employed by GPs include looking at work emails from home or in non-work time to try and stay up to date (11), staying late at work, taking work home or changing their appointment times (17). Support given through good working relationships within a GP practice were cited as important for helping GPs cope.

'People are aware of other people's needs and we work together as a group and I think it is a very supportive practice... I don't think I'd still be in the NHS if I was working in another practice, I probably would have left years ago actually' (Sansom et al., 2016) (12).

### **Alternative roles for GPs**

All six UK semi-structured interview studies contributed to the theme of “alternative roles”.

#### **New professional roles / extended roles**

In one study, two GPs reported completing further training in order to leave general practice; one to become a full-time holistic therapist, while the other intended to work part-time as a complementary therapist (11).

#### **Skills transfer**

Alternative job roles mentioned by GPs, that used skills transferable from working as a GP, included appraiser, Clinical Commissioning Group lead, advisory committee member, pharmaceutical consultancy work and working for a medical school.

‘A medical degree is one of the most wide-ranging degrees there is: it’s about science, research, communication, empathy, organisation, management - we’re pretty skilled people... Other people want me to do other stuff now; they’ll pay me good money and treat me very differently to what is currently happening to GPs.’ (Campbell et al., 2015) (11).

#### **Professional development / specialisation**

One study proposed that for younger GPs, having a medical specialism was thought to provide greater flexibility towards retirement and doctors who already worked part-time in specialist areas outside general practice intended to work entirely in the speciality when they retired (14). Other ‘retired’ GPs undertook locums, or work outside general practice such as Criminal Injuries Compensation Appeal Panel Tribunals or DSS (Department for Social Services) Tribunals (15). Others had combined working as a GP with other jobs, such as teaching, to have a more portfolio career (16).

#### **Relocation**

Changing jobs (to other medical jobs outside general practice) and relocating abroad were reported in one study to account for some GPs leaving UK general practice (17).
